# Supplementary material
Source: MDPI journal article supplement (https://www.mdpi.com/2073-4433/14/2/380)
Supplement: s1 [file s1]

## Supplementary Materials:

Fei Li <sup>1,2</sup>, Qiuping Zheng <sup>2</sup>, Yongcheng Jiang <sup>2</sup>, Aiping Xun <sup>2</sup>, Jieru Zhang <sup>3</sup>, Hui Zheng <sup>2</sup> and Hong Wang <sup>4,5,\*</sup>

**Table S1.** student T-test of the difference.

| City:PT |                |           |         |                  |           |         |                   |           |         |                 |         |         |                 |           |         |  |
|---------|----------------|-----------|---------|------------------|-----------|---------|-------------------|-----------|---------|-----------------|---------|---------|-----------------|-----------|---------|--|
|         | O <sub>3</sub> |           |         | PM <sub>10</sub> |           |         | PM <sub>2.5</sub> |           |         | SO <sub>2</sub> |         |         | NO <sub>2</sub> |           |         |  |
| year    | AAC TSP        | AAC TC    | p-Value | AAC TSP          | AAC TC    | p-Value | AAC TSP           | AAC TC    | p-Value | AAC TSP         | AAC TC  | p-Value | AAC TSP         | AAC TC    | p-Value |  |
| 2019    | 64.6±38.2      | 76.4±42.5 | <0.05*  | 37.7±15.6        | 39.3±16.6 | 0.13    | 18.0±9.1          | 19.6±10.1 | <0.05*  | 5.3±1.8         | 5.8±1.7 | <0.05*  | 11.3±5.2        | 11.9±6.2  | 0.12    |  |
| 2020    | 61.3±42.7      | 76.0±53.7 | <0.05*  | 37.7±15.4        | 44.0±16.2 | <0.05*  | 16.1±8.6          | 22.2±10.1 | <0.05*  | 5.5±1.4         | 6.7±1.9 | <0.05*  | 13.9±5.3        | 15.1±5.3  | <0.05*  |  |
| 2021    | 60.1±35.7      | 72.3±30.5 | <0.05*  | 32.3±13.3        | 26.7±12.4 | <0.05*  | 15.1±7.6          | 14.1±7.7  | <0.05*  | 4.6±1.4         | 4.4±1.6 | <0.05*  | 11.2±4.7        | 9.8±4.3   | <0.05*  |  |
| City:QZ |                |           |         |                  |           |         |                   |           |         |                 |         |         |                 |           |         |  |
|         | O <sub>3</sub> |           |         | PM <sub>10</sub> |           |         | PM <sub>2.5</sub> |           |         | SO <sub>2</sub> |         |         | NO <sub>2</sub> |           |         |  |
| year    | AAC TSP        | AAC TC    | p-Value | AAC TSP          | AAC TC    | p-Value | AAC TSP           | AAC TC    | p-Value | AAC TSP         | AAC TC  | p-Value | AAC TSP         | AAC TC    | p-Value |  |
| 2019    | 60.9±41.6      | 75.2±47.1 | <0.05*  | 37.2±15.6        | 42.6±18.4 | <0.05*  | 17.0±8.5          | 19.7±11.5 | <0.05*  | 8.0±2.2         | 8.2±1.8 | 0.11    | 19.2±6.9        | 20.6±7.7  | <0.05*  |  |
| 2020    | 55.9±42.1      | 68.0±52.1 | <0.05*  | 34.4±16.2        | 43.6±18.0 | <0.05*  | 14.8±9.6          | 20.7±9.4  | <0.05*  | 5.2±3.4         | 5.2±1.9 | 0.89    | 18.3±8.9        | 20.6±9.5  | <0.05*  |  |
| 2021    | 60.9±39.3      | 76.3±37.5 | <0.05*  | 30.7±14.2        | 26.4±14.9 | <0.05*  | 14.3±8.0          | 14.2±9.1  | 0.86    | 4.5±3.2         | 3.8±1.5 | <0.05*  | 13.7±7.2        | 12.5±5.6  | <0.05*  |  |
| City:XM |                |           |         |                  |           |         |                   |           |         |                 |         |         |                 |           |         |  |
|         | O <sub>3</sub> |           |         | PM <sub>10</sub> |           |         | PM <sub>2.5</sub> |           |         | SO <sub>2</sub> |         |         | NO <sub>2</sub> |           |         |  |
| year    | AAC TSP        | AAC TC    | p-Value | AAC TSP          | AAC TC    | p-Value | AAC TSP           | AAC TC    | p-Value | AAC TSP         | AAC TC  | p-Value | AAC TSP         | AAC TC    | p-Value |  |
| 2019    | 60.9±35.2      | 71.4±42.9 | <0.05*  | 30.1±11.4        | 35.9±12.4 | <0.05*  | 16.7±8.0          | 20.4±8.9  | <0.05*  | 4.4±3.2         | 5.8±3.4 | <0.05*  | 17.8±10.6       | 24.5±12.7 | <0.05*  |  |
| 2020    | 54.6±32.4      | 65.8±43.0 | <0.05*  | 24.3±12.2        | 33.7±14.7 | <0.05*  | 12.7±8.8          | 20.7±11.3 | <0.05*  | 5.6±2.6         | 8.0±3.8 | <0.05*  | 15.9±9.4        | 23.0±13.1 | <0.05*  |  |
| 2021    | 57.6±31.0      | 75.9±31.1 | <0.05*  | 26.7±10.5        | 26.6±11.3 | 0.94    | 13.6±7.2          | 15.9±8.2  | <0.05*  | 4.7±2.2         | 4.5±2.5 | 0.11    | 15.7±6.9        | 15.7±7.8  | 0.91    |  |

\* Significant differences. AAC TSP:annual average concentration of TSP. AAC TC:annual average concentration during the DatesTC
